vation reinforcing the slow kinetics of the windkessel, with the cardiac parasympathetic system unable to rapidly buffer these surges. Clonidine patients (fig. 3D in our article<sup>2</sup>) shows little lability in pressure<sup>3</sup> linked to a reduced number or amplitude of bursts of sympathetic activity<sup>9</sup> combined with a large sinus arrhythmia at resting pressures.

**L. Quintin, M.D., Ph.D.**  
CHU Nord St. Etienne and Physiologie  
Faculté de Médecine  
Lyon, France  
quintin@univ-lyon1.fr  
**M. Ghignone, M.D., F.R.C.P.C.**  
Columbia Hospital  
West Palm Beach, Florida  
Torchio@aol.com

## References

1. Prys-Roberts C, Meloche R, Foex P: Studies of anaesthesia in relation to hypertension: I. Cardiovascular responses of treated and untreated patients. *Br J Anaesth* 1971; 43:122-37
2. Parlow J, Begou G, Sagnard P, Cottet-Emard JM, Levron JC, Annat G, Bonnet F, Ghignone M, Hughson RL, Viale JP, Quintin L: Cardiac

baroreflex during the postoperative period in patients with hypertension: Effect of clonidine. *ANESTHESIOLOGY* 1999; 90:681-92

3. Ghignone M, Calvillo O, Quintin L: Anesthesia and hypertension: The effect of clonidine on perioperative hemodynamics and isoflurane requirements. *ANESTHESIOLOGY* 1987; 67:3-10

4. Marin-Neto JA, Carneiro JJ, Maciel BC, Secches AL, Gallo L, Terra-Filho J, Manco JC, Lima-Filho EC, Vicente WVA, Sader AA, Amorim DS: Impairment of baroreflex control of the sinoatrial node after cardiac operations with extracorporeal circulation in man. *J Thorac Cardiovasc Surg* 1983; 86:718-26

5. Di Rienzo M, Bertinieri G, Mancia G, Pedotti A: A new method for evaluating the baroreflex role by a joint pattern analysis of pulse interval and systolic blood pressure series. *Med Biol Eng Comp* 1985; 23:313-4

6. Parlow J, Viale JP, Annat G, Hughson RL, Quintin L: Spontaneous cardiac baroreflex in humans: Comparison with drug-induced responses. *Hypertension* 1995; 25:1058-68

7. Fritsch JM, Eckberg DL, Graves LD, Wallin BG: Arterial pressure ramps provoke linear increases of heart period in humans. *Am J Physiol* 1986; 251:R1086-90

8. Katona PG, Barnett GO: Central origin of asymmetry in the carotid sinus reflex. *Ann N Y Acad Sci* 1969; 156:779-86

9. Wallin BG, Frisk-Holmberg M: The antihypertensive mechanism of clonidine in man: Evidence against a generalized reduction of sympathetic activity. *Hypertension* 1981; 3:340-6

(Accepted for publication November 23, 1999.)

Anesthesiology  
2000; 92:902-3  
© 2000 American Society of Anesthesiologists, Inc.  
Lippincott Williams & Wilkins, Inc.

## Hemodilution: Fewer Keystrokes, Greater Accuracy

*To the Editor:*—I found the article by Monk *et al.*<sup>1</sup> a valuable contribution to the transfusion literature, especially because they included timely cost-effectiveness data. I am pleased to see the increasing interest in perioperative acute normovolemic hemodilution, evidenced by recent articles in *ANESTHESIOLOGY*<sup>1</sup> and elsewhere.<sup>2,3</sup> Perioperative acute normovolemic hemodilution can spare many surgical patients exposure to allogeneic blood.<sup>4</sup> Articles discussing hemodilution frequently refer to Gross's formula for estimating allowable blood loss<sup>5</sup>:

$$\text{Allowable blood loss} = (\text{Estimated blood volume}) \times [(\text{Hct}_{\text{start}} - \text{Hct}_{\text{final}}) / \text{Hct}_{\text{average}}]$$

This formula was an ingenious approximation to the original formula described in 1974.<sup>6</sup> The original theoretical equation, which has been verified in several clinical studies,<sup>4-7</sup> involved the solution of a differential equation that resulted in a formula requiring the computation of natural logarithms:

$$\text{Allowable blood loss} = (\text{Estimated blood volume}) \times [\ln(\text{Hct}_{\text{start}} / \text{Hct}_{\text{final}})]$$

In 1974, computing natural logs was inconvenient for the practicing clinician. However, now virtually everyone has access to inexpensive, solar-powered, lightweight, hand-held calculators that easily compute natural logs. Therefore, anyone can use the theoretical formula rather than an approximation. And it actually requires fewer keystrokes to compute a more accurate result.

**Denis L. Bourke, M.D.**

Associate Professor of Anesthesiology  
Baltimore Veterans Affairs Medical Center  
Department of Anesthesiology  
University of Maryland at Baltimore  
Baltimore, Maryland 21201-1566

## References

1. Monk TG, Goodnough LT, Brecher ME, Colberg JW, Andriole GL, Catalona WJ: A prospective randomized comparison of three blood

## CORRESPONDENCE

conservation strategies for radical prostatectomy. *ANESTHESIOLOGY* 1999; 91:24-33

2. Habler OP, Kleen MS, Podtschaske AH, Hutter JW, Tiede M, Kemming GI, Welte MV, Corso CO, Messmer KF: The effect of acute normovolemic hemodilution (ANH) on myocardial contractility in anesthetized dogs. *Anesth Analg* 1996; 83:451-8

3. McLoughlin TM, Fontana JL, Alving B, Mongan PD, Bunger R: Profound normovolemic hemodilution: Hemostatic effects in patients and in a porcine model. *Anesth Analg* 1996; 83:459-65

4. Ness PM, Bourke DL, Walsh PC: A randomized trial of perioper-

ative hemodilution versus transfusion of preoperatively donated autologous blood in elective surgery. *Transfusion* 1992; 32:226-30

5. Gross JB: Estimating allowable blood loss: Corrected for dilution. *ANESTHESIOLOGY* 1983; 58:277-80

6. Bourke DL, Smith TC: Estimating allowable hemodilution. *ANESTHESIOLOGY* 1974; 41:609-12

7. Ward CF, Meathe EA, Benumof JL, Trousdale F: A computer normogram for blood loss replacement. *ANESTHESIOLOGY* 1980; 53:S126

(Accepted for publication November 4, 1999.)

Anesthesiology  
2000; 92:903

© 2000 American Society of Anesthesiologists, Inc.  
Lippincott Williams & Wilkins, Inc.

## Bispectral Index Increases and Decreases Are Not Always Signs of Inadequate Anesthesia

*To the Editor:*—We read with interest the report by Gallagher<sup>1</sup> on the influence of pacer artifact on the bispectral index (BIS). We wish to report another situation in which an item of operating room equipment resulted in alteration in the BIS signal.

The patient was a 58-yr-old woman who was anesthetized with isoflurane, sufentanil, and atracurium for a left partial hepatectomy. After induction, the BIS (model A1000 v3.12; Aspect Medical Systems, Natick, MA) was maintained at < 60 with electrodes impedances < 1,000  $\Omega$ . Forced-air warming therapy was performed using an upper-body blanket (Bair Hugger; Augustine Medical Inc., Eden Prairie, MN). Just before incision, the BIS was 56. After incision, cautery interrupted the electroencephalographic signal for a few minutes. When the signal returned, it showed a marked increase to > 80. However, hemody-

namics were unchanged, and there were no other changes in clinical signs. On investigation, we noted that the forced air blanket, which had been turned on simultaneously with the incision, lay directly on the skin with the warm air blowing on the forehead electrodes. Turning off the heating unit resulted in a decrease in BIS to  $\approx$  60 (fig. 1). Each time forced-air warming resumed, the BIS increased. When the Bair Hugger unit was on but disconnected from the blanket, the BIS returned to values < 60 (fig. 1). This intervention eliminated any role for electrical interference caused by the device. We speculate that vibration of the head wires caused by the air circulation generated an artifact that was interpreted as a higher BIS value; however, this artifact was not visible on the raw electroencephalographic trace.

Bispectral index monitoring in the operating room is generally straightforward, but new medical devices may interfere with it. Knowledge of potential interference from forced-air warming systems must be taken into account when interpreting BIS.

**Bruno Guignard, M.D.**

Assistant Professor

**Marcel Chauvin, M.D.**

Professor of Anesthesiology and Chairman  
Department of Anesthesiology

Centre Hospitalier Universitaire Ambroise Paré  
Boulogne, France

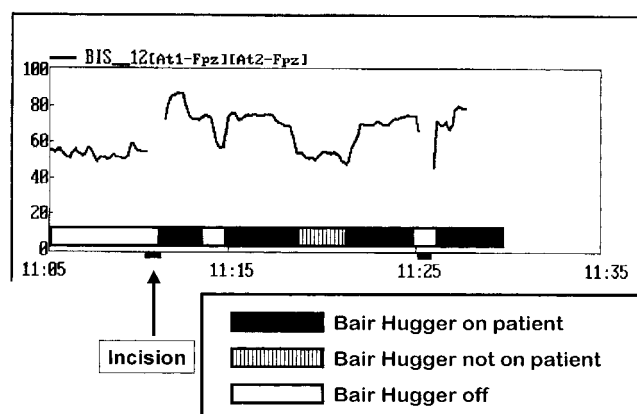

**Fig. 1.** Bispectral index trend display showing increases when cover of Bair Hugger is on patient.

## Reference

1. Gallagher JD: Pacer-induced artifact in the bispectral analysis for the electroencephalogram (letter). *ANESTHESIOLOGY* 1999; 90:636

(Accepted for publication November 9, 1999.)
